# Supplementary material for: Antibacterial and Disinfecting Effects of Standardised Tea Extracts on More than 100 Clinical Isolates of Methicillin-Resistant Staphylococcus aureus
Source: MDPI journal article supplement (doi:10.3390/plants12193440), 2023-09-29
Supplement: s1 [file s1]

Supplementary Materials

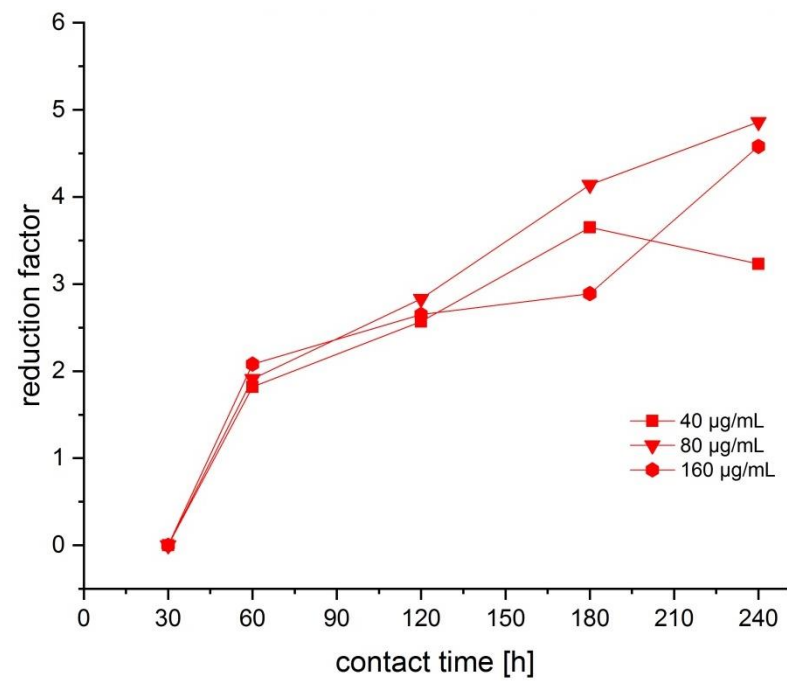

**Figure S1.** Effect of GTE on reduction factor of MSSA ATCC 43300 at tested concentrations.

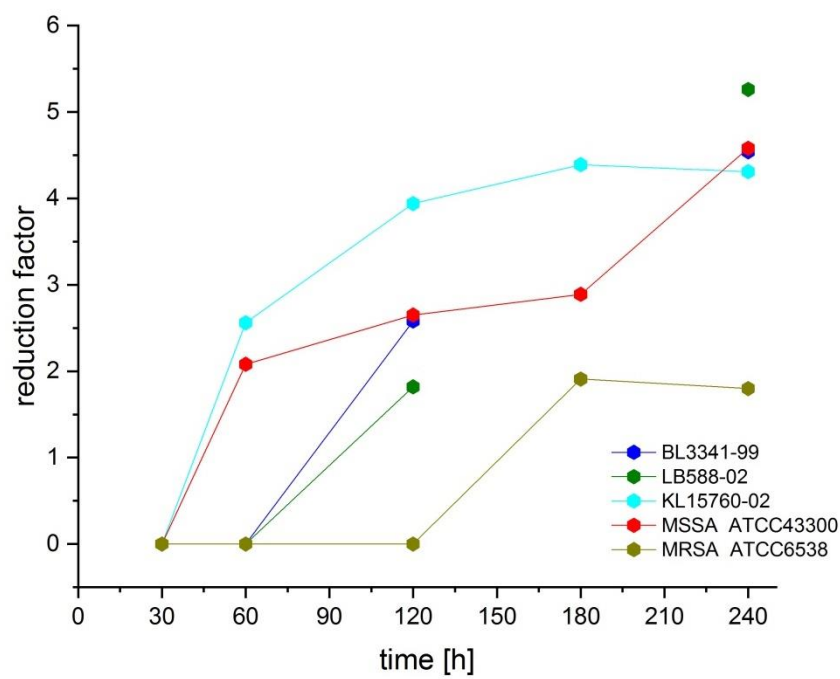

**Figure S2.** Time-kill-plot for GTE with 160 µg/mL EGCG content for the tested strains.

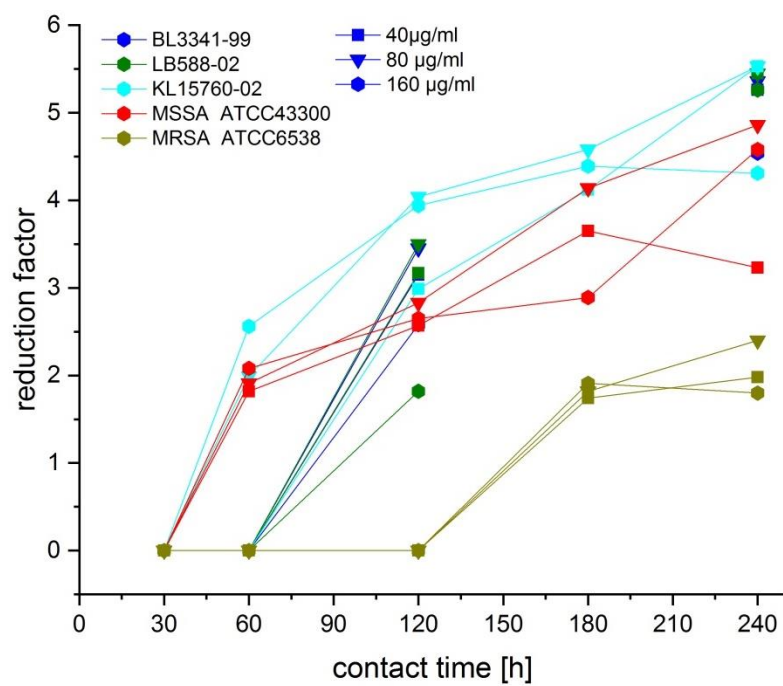

**Figure S3.** Overview of results for the time-kill-plot experiment.
